# Supplementary material for: Cereal Domestication and Evolution of Branching: Evidence for Soft Selection in the Tb1 Orthologue of Pearl Millet (Pennisetum glaucum [L.] R. Br.)
Source: PubMed Central journal article supplement (PMC3142148; doi:10.1371/journal.pone.0022404), 2011-07-22
Supplement: pone.0022404.s005.pdf [file pone.0022404.s005.pdf]

**Supporting Table 1.** List of primers used in the study.

| <i>PgTb1</i> primers                                                                              |                             |
|---------------------------------------------------------------------------------------------------|-----------------------------|
| Name                                                                                              | Sequence                    |
| <b>Cloning of <i>PgTb1</i></b>                                                                    |                             |
| U1                                                                                                | TGCACTGGATCTATCACTACTCA     |
| L2                                                                                                | AGTTCATCGTACACAGCCAATTAC    |
| <b>Southern blotting and library hybridization; <i>PgTb1</i> mapping</b>                          |                             |
| U1                                                                                                | TGCACTGGATCTATCACTACTCA     |
| L1                                                                                                | GAGTCGATCACGGCTTGTG         |
| <b>RT-PCR analysis of the structure of <i>Tb1</i></b>                                             |                             |
| F1                                                                                                | ATGAGCCCATGCCTCCTC          |
| F2                                                                                                | CATACAGGTCCCATATGCCTAA      |
| R1                                                                                                | GCTGTTGGTAAAGCGGTAAGTC      |
| R2                                                                                                | GGCATGGGCTCATGTTTCATAC      |
| <b><i>In-situ</i> hybridization probe</b>                                                         |                             |
| In-situF                                                                                          | CTCCAGCAGCCTCTCCGT          |
| In-situR                                                                                          | ATGTTGGATGATGGGTGGT         |
| <b>Polymorphism in worldwide collection (numbers refer to position in the reference Tift23DB)</b> |                             |
| <i>PCR amplification</i>                                                                          |                             |
| 53F                                                                                               | AACCTGTCCAGCTCCTCACAAA      |
| 1818R                                                                                             | ACTGAACACCGTGGGAGTGT        |
| 1703F                                                                                             | GCCTAAAGTTGGGAAGACCAG       |
| 4266R                                                                                             | CATGGTAGAGAAATTGACCTTCAG    |
| 3380F                                                                                             | GGTGCTCATCAACCCTCAAC        |
| 6693R                                                                                             | ACAATTGCCTTGCATTGGTC        |
| <i>Sequencing</i>                                                                                 |                             |
| 453F                                                                                              | AATGAAAGGATAAGACCAGGAAA     |
| 860F                                                                                              | CCCATTTTGGAAACAACACC        |
| 908R                                                                                              | TACGTACGCAAATTCTGTTG        |
| 1260F                                                                                             | ATAGGTCTGAATGCCACGTTTC      |
| 1756R                                                                                             | ATGGTAGGGGACCGATGTG         |
| 1765F                                                                                             | ACACTACGACAAAAAGCACTGG      |
| 2171F                                                                                             | TGCACTTGATGTCTTGATGC        |
| 2523F                                                                                             | CAATCCACCACCAGCTTCTT        |
| 2604R                                                                                             | GCTGGTAGCTGAGGTGGAAG        |
| 2987F                                                                                             | CTCCAGCAGCCTCTCCGT          |
| 3410R                                                                                             | TTGCATCTCCCTCCATTGT         |
| 4174F                                                                                             | ATGATTCAATTGTTGATGAAAG      |
| 4266R                                                                                             | CATGGTAGAGAAATTGACCTTCAG    |
| 4667F                                                                                             | ATCATGCAGTTTCAGTTTCTGT      |
| 4970F                                                                                             | GATGTTGGCATATCTTAATTTTGTG   |
| 5077R                                                                                             | AAATGCACAAAGCACCTGAA        |
| 5447F                                                                                             | TGGATGACCGGATGTGAAC         |
| 5788F                                                                                             | ACTTGAGGATGCAAACCTGACAC     |
| 5839R                                                                                             | GATGTATAGTGAACCACCCTCTG     |
| 6257F                                                                                             | CTTGCTTGGTTAATCCCTTTCA      |
| <b>STS loci primers</b>                                                                           |                             |
| Name                                                                                              | Sequence                    |
| STS713F                                                                                           | CTAGTCGAAGCATTGTGAATC       |
| STS713R                                                                                           | TCTGGATGCACCATAACC          |
| STS738F                                                                                           | CATCAGCATGTGAGCATG          |
| STS738R                                                                                           | TCCACAGTGAGCAACCTCAG        |
| STS476F                                                                                           | GACCGAGCCTCCTTTCTCTG        |
| STS476R                                                                                           | CGTTCTAGCATTCCGGATTATGG     |
| <b><i>EF1-alpha</i> primers</b>                                                                   |                             |
| Name                                                                                              | Sequence                    |
| EF1A-F1                                                                                           | TTACAGATGGATGCTACTACACCCAAG |
| EF1A-R1                                                                                           | ATCTGGTCAAGAGCCTCAAGCA      |
| EF1A-R2                                                                                           | TTGTACCAGTCAAGGTTGGTGGA     |
| EF1A-R3                                                                                           | ATGGGGACAAAGGCAATCTTGTA     |
