# Supplementary material for: Cereal Domestication and Evolution of Branching: Evidence for Soft Selection in the Tb1 Orthologue of Pearl Millet (Pennisetum glaucum [L.] R. Br.)
Source: PubMed Central journal article supplement (PMC3142148; doi:10.1371/journal.pone.0022404), 2011-07-22
Supplement: pone.0022404.s006.pdf [file pone.0022404.s006.pdf]

**Supporting table S2. List of accessions sequenced for the PgTb1 polymorphism study.**

| Name  | Type of the population collected | Phenotype of the individual | Geographic origin      | sequenced for STS713 | sequenced for STS738 | sequenced for STS476 |
|-------|----------------------------------|-----------------------------|------------------------|----------------------|----------------------|----------------------|
| Tb1   | Domesticated                     | Domesticated                | USA, Tift23DB cultivar |                      |                      | +                    |
| Tb5   | Domesticated                     | Domesticated                | Benin                  |                      |                      | +                    |
| Tb6   | Domesticated                     | Domesticated                | Benin                  |                      |                      |                      |
| Tb11  | Domesticated                     | Domesticated                | Burkina-faso           |                      |                      | +                    |
| Tb13  | Wild                             | Wild                        | Burkina-faso           | +                    | +                    |                      |
| Tb16  | Domesticated                     | Domesticated                | Cameroon               | +                    | +                    |                      |
| Tb18  | Wild                             | Wild                        | Cameroon               | +                    |                      | +                    |
| Tb19  | Wild                             | Wild                        | Cameroon               |                      |                      |                      |
| Tb70  | Wild                             | Weedy                       | Centrafrican Republic  | +                    | +                    | +                    |
| Tb71  | Domesticated                     | Domesticated                | Centrafrican Republic  |                      |                      | +                    |
| Tb90  | Domesticated                     | Domesticated                | Chad                   |                      | +                    | +                    |
| Tb92  | Domesticated                     | Domesticated                | Chad                   | +                    | +                    |                      |
| Tb94  | Wild                             | Wild                        | Chad                   | +                    |                      | +                    |
| Tb96  | Wild                             | Wild                        | Chad                   |                      |                      |                      |
| Tb89  | Domesticated                     | Domesticated                | Chad                   | +                    |                      | +                    |
| Tb20  | Domesticated                     | Domesticated                | China                  | +                    |                      | +                    |
| Tb68  | Domesticated                     | Domesticated                | India (rajasthan)      |                      |                      | +                    |
| Tb27  | Domesticated                     | Domesticated                | India, cultivar J104   | +                    |                      | +                    |
| Tb28  | Domesticated                     | Domesticated                | Kenya                  | +                    |                      | +                    |
| Tb31  | Domesticated                     | Domesticated                | Mali                   |                      | +                    | +                    |
| Tb37  | Wild                             | Wild                        | Mali                   |                      |                      | +                    |
| Tb38  | Wild                             | Wild                        | Mali                   | +                    |                      | +                    |
| P8470 | Wild                             | Wild                        | Mali                   | +                    | +                    | +                    |
| P8473 | Wild                             | Wild                        | Mali                   | +                    | +                    | +                    |
| P8475 | Wild                             | Wild                        | Mali                   | +                    | +                    | +                    |
| Tb42  | Domesticated                     | Domesticated                | Mauritania             | +                    | +                    | +                    |
| Tb43  | Domesticated                     | Domesticated                | Mauritania             | +                    | +                    | +                    |
| Tb45  | Domesticated                     | Domesticated                | Mauritania             | +                    | +                    | +                    |
| Tb46  | Wild                             | Wild                        | Mauritania             | +                    |                      |                      |
| Tb47  | Wild                             | Wild                        | Mauritania             |                      | +                    |                      |
| P8493 | Wild                             | Wild                        | Mauritania             | +                    | +                    | +                    |
| P8497 | Wild                             | Wild                        | Mauritania             | +                    | +                    | +                    |
| Tb40  | Domesticated                     | Domesticated                | Morocco                | +                    | +                    | +                    |
| Tb49  | Domesticated                     | Domesticated                | Niger                  |                      |                      |                      |
| Tb52  | Wild                             | Wild                        | Niger                  | +                    | +                    | +                    |
| Tb56  | Domesticated                     | Domesticated                | Nigeria                | +                    | +                    | +                    |
| Tb57  | Domesticated                     | Domesticated                | Nigeria                | +                    | +                    | +                    |
| Tb59  | Wild                             | Wild                        | Nigeria                | +                    | +                    | +                    |
| Tb61  | Wild                             | Wild                        | Nigeria                | +                    |                      |                      |
| Tb67  | Domesticated                     | Domesticated                | Pakistan               | +                    |                      | +                    |
| Tb75  | Domesticated                     | Domesticated                | Senegal                | +                    |                      | +                    |
| Tb78  | Wild                             | Wild                        | Senegal                | +                    |                      | +                    |
| Tb79  | Wild                             | Wild                        | Senegal                | +                    | +                    |                      |
| Tb74  | Domesticated                     | Domesticated                | Senegal                | +                    | +                    | +                    |
| Tb80  | Domesticated                     | Domesticated                | Sudan                  |                      |                      | +                    |
| Tb83  | Wild                             | Weedy                       | Sudan                  | +                    |                      | +                    |
| Tb84  | Wild                             | Weedy                       | Sudan                  |                      |                      |                      |
| Tb88  | Domesticated                     | Domesticated                | Tanzania               | +                    |                      | +                    |
| Tb99  | Domesticated                     | Domesticated                | Tunisia                | +                    | +                    | +                    |
| Tb100 | Domesticated                     | Domesticated                | Tunisia                |                      |                      | +                    |
| Tb62  | Domesticated                     | Domesticated                | Uganda                 | +                    | +                    |                      |
| Tb103 | Domesticated                     | Domesticated                | Zambia                 |                      | +                    | +                    |

  

|                                    |                                                 |                                                                                                                       |                                                         |
|------------------------------------|-------------------------------------------------|-----------------------------------------------------------------------------------------------------------------------|---------------------------------------------------------|
| Additional accessions<br>(for STS) | 95 W chad<br>P8491 W Mauritania<br>Alzu-W-Niger | P8491 W mauritania<br>P8475S- W- Mali<br>TB59BS-W-Nigeria<br>TB16S-D-Cameroon<br>TB31BC-D-Mali<br>TB42BC-D-Mauritania | 7 D benin<br>25 D India<br>30 D mali<br>44 D Mauritania |
|------------------------------------|-------------------------------------------------|-----------------------------------------------------------------------------------------------------------------------|---------------------------------------------------------|
