# Supplementary material for: Cereal Domestication and Evolution of Branching: Evidence for Soft Selection in the Tb1 Orthologue of Pearl Millet (Pennisetum glaucum [L.] R. Br.)
Source: PubMed Central journal article supplement (PMC3142148; doi:10.1371/journal.pone.0022404), 2011-07-22
Supplement: pone.0022404.s007.pdf [file pone.0022404.s007.pdf]

**Supporting Table S3:** p-values of neutrality tests in the domesticated sample for each simulated demographic scenario. Those scenarios rejected according to their likelihood scores are in *italics*.

|                                       |                                   |                         |           | p-value for Tajima's D (in %) |            |                  |            |         |         |                  |            |                  | p-value for Fu & Li's F* (in %) |         |         |                |            |                  | p-value for Fu's Fs (in %) |         |         |                  |            |                  |         |         |         |
|---------------------------------------|-----------------------------------|-------------------------|-----------|-------------------------------|------------|------------------|------------|---------|---------|------------------|------------|------------------|---------------------------------|---------|---------|----------------|------------|------------------|----------------------------|---------|---------|------------------|------------|------------------|---------|---------|---------|
|                                       |                                   |                         |           | PgTb1 upstream                |            |                  | PgTb1 mRNA |         |         | PgTb1 downstream |            |                  | STS 713                         | STS 738 | STS 476 | PgTb1 upstream |            |                  | PgTb1 mRNA                 |         |         | PgTb1 downstream |            |                  | STS 713 | STS 738 | STS 476 |
|                                       |                                   |                         |           | PgTb1 upstream                | PgTb1 mRNA | PgTb1 downstream | STS 713    | STS 738 | STS 476 | PgTb1 upstream   | PgTb1 mRNA | PgTb1 downstream | STS 713                         | STS 738 | STS 476 | PgTb1 upstream | PgTb1 mRNA | PgTb1 downstream | STS 713                    | STS 738 | STS 476 | PgTb1 upstream   | PgTb1 mRNA | PgTb1 downstream | STS 713 | STS 738 | STS 476 |
| <b>Weak expansion (N0/N2 = 1)</b>     | Intense bottleneck (N1/N2 = 5e-4) | Long bottleneck (500y)  | u weak    | Model 1                       | 0.11       | 0.15             | < 0.01     | 5.3     | 51.8    | 51.3             | 0.39       | 0.06             | < 0.01                          | 5.1     | 29.3    | 44.8           | 0.24       | 0.04             | < 0.01                     | 3.08    | 34.00   | 7.40             |            |                  |         |         |         |
|                                       |                                   |                         | u average | Model 2                       | 0.08       | 0.12             | 0.03       | 5.2     | 51.7    | 49.1             | 0.35       | 0.07             | 0.01                            | 5.2     | 28.2    | 41.1           | 0.20       | 0.02             | < 0.01                     | 2.84    | 33.02   | 6.14             |            |                  |         |         |         |
|                                       |                                   |                         | u strong  | Model 3                       | 0.14       | 0.07             | < 0.01     | 4.4     | 48.3    | 33.3             | 0.34       | 0.06             | 0.01                            | 4.3     | 24.7    | 22.3           | 0.02       | < 0.01           | < 0.01                     | 0.91    | 23.45   | 0.87             |            |                  |         |         |         |
|                                       |                                   | Short bottleneck (100y) | u weak    | Model 4                       | 0.06       | 0.11             | 0.01       | 5.6     | 51.4    | 51.6             | 0.29       | 0.07             | < 0.01                          | 5.4     | 28.3    | 44.7           | 0.22       | 0.05             | < 0.01                     | 3.17    | 34.07   | 7.54             |            |                  |         |         |         |
|                                       |                                   |                         | u average | Model 5                       | 0.12       | 0.12             | < 0.01     | 5.5     | 51.2    | 50.8             | 0.35       | 0.11             | 0.01                            | 5.4     | 28.7    | 43.8           | 0.11       | 0.01             | < 0.01                     | 3.00    | 33.15   | 7.12             |            |                  |         |         |         |
|                                       |                                   |                         | u strong  | Model 6                       | 0.09       | 0.05             | < 0.01     | 5.2     | 50.8    | 47.4             | 0.25       | 0.06             | < 0.01                          | 5.3     | 27.9    | 38.4           | 0.16       | 0.05             | < 0.01                     | 2.42    | 31.42   | 5.15             |            |                  |         |         |         |
|                                       | Average bottleneck (N1/N2 = 5e-3) | Long bottleneck (500y)  | u weak    | Model 7                       | 0.1        | 0.06             | < 0.01     | 5.3     | 52      | 51.3             | 0.33       | 0.05             | < 0.01                          | 5.3     | 28.4    | 45             | 0.13       | 0.02             | < 0.01                     | 3.06    | 34.25   | 7.75             |            |                  |         |         |         |
|                                       |                                   |                         | u average | Model 8                       | 0.13       | 0.1              | < 0.01     | 5.4     | 51.5    | 50.8             | 0.41       | 0.06             | < 0.01                          | 5.4     | 28.8    | 44.4           | 0.20       | 0.05             | < 0.01                     | 2.73    | 33.64   | 7.47             |            |                  |         |         |         |
|                                       |                                   |                         | u strong  | Model 9                       | 0.09       | 0.07             | 0.01       | 5.6     | 51.1    | 49.7             | 0.3        | 0.08             | < 0.01                          | 5.4     | 28.4    | 41.2           | 0.14       | 0.03             | < 0.01                     | 2.59    | 32.68   | 6.13             |            |                  |         |         |         |
|                                       |                                   | Short bottleneck (100y) | u weak    | Model 10                      | 0.11       | 0.11             | < 0.01     | 5.4     | 50.9    | 51.3             | 0.28       | 0.08             | < 0.01                          | 5.3     | 28.2    | 44.6           | 0.18       | 0.04             | < 0.01                     | 3.24    | 32.85   | 7.20             |            |                  |         |         |         |
|                                       |                                   |                         | u average | Model 11                      | 0.18       | 0.09             | 0.02       | 5.7     | 51.8    | 52               | 0.38       | 0.07             | < 0.01                          | 5.4     | 28.6    | 45             | 0.17       | 0.03             | < 0.01                     | 3.52    | 33.60   | 7.72             |            |                  |         |         |         |
|                                       |                                   |                         | u strong  | Model 12                      | 0.04       | 0.09             | 0.01       | 5.4     | 51.1    | 51.4             | 0.23       | 0.05             | < 0.01                          | 4.9     | 28.7    | 43.6           | 0.18       | 0.05             | < 0.01                     | 3.06    | 33.82   | 6.89             |            |                  |         |         |         |
|                                       | Weak bottleneck (N1/N2 = 5e-2)    | Long bottleneck (500y)  | u weak    | Model 13                      | 0.13       | 0.05             | 0.02       | 5.7     | 51.5    | 50.9             | 0.31       | 0.03             | < 0.01                          | 5.6     | 28.4    | 45             | 0.19       | 0.11             | < 0.01                     | 3.02    | 33.02   | 7.52             |            |                  |         |         |         |
|                                       |                                   |                         | u average | Model 14                      | 0.06       | 0.08             | < 0.01     | 5.4     | 50.7    | 51.6             | 0.2        | 0.08             | < 0.01                          | 5.3     | 28      | 44.6           | 0.27       | 0.04             | < 0.01                     | 2.86    | 33.59   | 7.08             |            |                  |         |         |         |
|                                       |                                   |                         | u strong  | Model 15                      | 0.09       | 0.09             | 0.02       | 5.3     | 51.3    | 51.1             | 0.32       | 0.08             | < 0.01                          | 5.1     | 28.7    | 44.2           | 0.21       | 0.04             | < 0.01                     | 2.96    | 32.79   | 7.33             |            |                  |         |         |         |
|                                       |                                   | Short bottleneck (100y) | u weak    | Model 16                      | 0.11       | 0.11             | < 0.01     | 5.3     | 52      | 50.7             | 0.25       | 0.07             | < 0.01                          | 5.2     | 28.6    | 44.1           | 0.24       | 0.03             | < 0.01                     | 3.01    | 33.52   | 7.55             |            |                  |         |         |         |
|                                       |                                   |                         | u average | Model 17                      | 0.09       | 0.08             | 0.01       | 5.4     | 51.3    | 51.1             | 0.37       | 0.08             | < 0.01                          | 5.3     | 28      | 44.7           | 0.09       | 0.01             | < 0.01                     | 2.94    | 33.79   | 7.45             |            |                  |         |         |         |
|                                       |                                   |                         | u strong  | Model 18                      | 0.12       | 0.09             | 0.01       | 5.4     | 52.1    | 51.1             | 0.31       | 0.06             | < 0.01                          | 5.3     | 29.4    | 44.7           | 0.21       | 0.06             | < 0.01                     | 2.91    | 33.94   | 7.50             |            |                  |         |         |         |
| <b>Average expansion (N0/N2 = 10)</b> | Intense bottleneck (N1/N2 = 5e-4) | Long bottleneck (500y)  | u weak    | Model 19                      | 0.13       | 0.07             | < 0.01     | 5.1     | 51.5    | 48.9             | 0.34       | 0.06             | < 0.01                          | 5.1     | 28.3    | 40.9           | 0.27       | 0.02             | < 0.01                     | 2.88    | 32.58   | 5.91             |            |                  |         |         |         |
|                                       |                                   |                         | u average | Model 20                      | 0.11       | 0.08             | < 0.01     | 4.2     | 48.1    | 32.7             | 0.28       | 0.08             | < 0.01                          | 4       | 25.6    | 21.7           | 0.02       | 0.01             | < 0.01                     | 0.91    | 23.99   | 0.86             |            |                  |         |         |         |
|                                       |                                   |                         | u strong  | Model 21                      | 0.09       | 0.11             | < 0.01     | 3.9     | 29      | 27.8             | 0.22       | 0.1              | < 0.01                          | 4.6     | 14.2    | 18.5           | < 0.01     | < 0.01           | < 0.01                     | < 0.01  | 0.23    | 5.80             |            |                  |         |         |         |
|                                       |                                   | Short bottleneck (100y) | u weak    | Model 22                      | 0.11       | 0.08             | 0.01       | 5.3     | 51.4    | 50.7             | 0.39       | 0.09             | < 0.01                          | 5.1     | 28.1    | 44.6           | 0.16       | 0.03             | < 0.01                     | 2.78    | 33.40   | 7.15             |            |                  |         |         |         |
|                                       |                                   |                         | u average | Model 23                      | 0.05       | 0.11             | < 0.01     | 5       | 51      | 46.3             | 0.3        | 0.09             | < 0.01                          | 5       | 28      | 37.3           | 0.10       | 0.03             | < 0.01                     | 2.38    | 31.60   | 5.08             |            |                  |         |         |         |
|                                       |                                   |                         | u strong  | Model 24                      | 0.08       | 0.07             | 0.03       | 4.4     | 44.7    | 25.7             | 0.24       | 0.04             | 0.02                            | 4.5     | 22.4    | 16.9           | 0.00       | < 0.01           | < 0.01                     | 0.31    | 15.66   | 0.27             |            |                  |         |         |         |
|                                       | Average bottleneck (N1/N2 = 5e-3) | Long bottleneck (500y)  | u weak    | Model 25                      | 0.09       | 0.1              | < 0.01     | 5.3     | 51.1    | 50.6             | 0.33       | 0.03             | 0.01                            | 5.1     | 28.3    | 44.3           | 0.26       | 0.01             | < 0.01                     | 2.86    | 33.48   | 7.01             |            |                  |         |         |         |
|                                       |                                   |                         | u average | Model 26                      | 0.11       | 0.07             | 0.01       | 5.7     | 51.2    | 48.5             | 0.28       | 0.04             | < 0.01                          | 5.8     | 27.9    | 40.5           | 0.15       | 0.03             | < 0.01                     | 2.62    | 32.48   | 5.78             |            |                  |         |         |         |
|                                       |                                   |                         | u strong  | Model 27                      | 0.05       | 0.05             | 0.03       | 4.5     | 48.3    | 34               | 0.19       | 0.03             | 0.01                            | 4.7     | 25.3    | 24.1           | 0.03       | < 0.01           | < 0.01                     | 0.94    | 23.92   | 1.20             |            |                  |         |         |         |
|                                       |                                   | Short bottleneck (100y) | u weak    | Model 28                      | 0.07       | 0.09             | 0.02       | 5.1     | 52.4    | 51.3             | 0.26       | 0.09             | 0.01                            | 4.9     | 29.1    | 45             | 0.25       | 0.05             | < 0.01                     | 3.04    | 33.52   | 7.24             |            |                  |         |         |         |
|                                       |                                   |                         | u average | Model 29                      | 0.12       | 0.12             | 0.01       | 5.7     | 50.9    | 50.9             | 0.28       | 0.08             | 0.01                            | 5.5     | 28.5    | 43.9           | 0.19       | 0.04             | < 0.01                     | 3.13    | 32.51   | 7.16             |            |                  |         |         |         |
|                                       |                                   |                         | u strong  | Model 30                      | 0.03       | 0.13             | 0.01       | 5.3     | 50.3    | 47.5             | 0.22       | 0.08             | < 0.01                          | 5.3     | 27.5    | 38.8           | 0.18       | 0.02             | < 0.01                     | 2.68    | 31.62   | 5.29             |            |                  |         |         |         |
|                                       | Weak bottleneck (N1/N2 = 5e-2)    | Long bottleneck (500y)  | u weak    | Model 31                      | 0.09       | 0.07             | < 0.01     | 5.5     | 51.2    | 52.2             | 0.27       | 0.04             | < 0.01                          | 5.5     | 28.6    | 45.9           | 0.25       | 0.08             | < 0.01                     | 3.04    | 33.75   | 7.40             |            |                  |         |         |         |
|                                       |                                   |                         | u average | Model 32                      | 0.12       | 0.1              | 0.01       | 5.4     | 52.1    | 52.4             | 0.27       | 0.09             | < 0.01                          | 5.4     | 29.2    | 45.1           | 0.26       | 0.01             | < 0.01                     | 2.94    | 34.27   | 7.47             |            |                  |         |         |         |
|                                       |                                   |                         | u strong  | Model 33                      | 0.1        | 0.04             | < 0.01     | 5.7     | 51.2    | 50.2             | 0.3        | 0.03             | < 0.01                          | 5.5     | 28.4    | 43.3           | 0.23       | 0.02             | < 0.01                     | 2.68    | 32.63   | 6.57             |            |                  |         |         |         |
|                                       |                                   | Short bottleneck (100y) | u weak    | Model 34                      | 0.11       | 0.12             | < 0.01     | 5.5     | 51.1    | 51.8             | 0.3        | 0.07             | < 0.01                          | 5.5     | 28.4    | 45.4           | 0.22       | 0.04             | < 0.01                     | 3.04    | 33.17   | 7.20             |            |                  |         |         |         |
|                                       |                                   |                         | u average | Model 35                      | 0.12       | 0.12             | 0.02       | 5.7     | 51.7    | 51               | 0.34       | 0.04             | 0.02                            | 5.3     | 28.8    | 44.9           | 0.21       | 0.05             | < 0.01                     | 3.16    | 33.46   | 7.00             |            |                  |         |         |         |
|                                       |                                   |                         | u strong  | Model 36                      | 0.1        | 0.12             | < 0.01     | 5.4     | 51.9    | 51.6             | 0.41       | 0.07             | < 0.01                          | 5       | 29      | 46.5           | 0.17       | 0.06             | < 0.01                     | 3.07    | 34.65   | 7.86             |            |                  |         |         |         |
| <b>Large expansion (N0/N2 = 100)</b>  | Intense bottleneck (N1/N2 = 5e-4) | Long bottleneck (500y)  | u weak    | Model 37                      | 0.11       | 0.06             | < 0.01     | 4.6     | 47.8    | 32.9             | 0.26       | 0.07             | < 0.01                          | 4.5     | 25.1    | 22.3           | 0.04       | 0.00             | < 0.01                     | 1.09    | 23.80   | 0.86             |            |                  |         |         |         |
|                                       |                                   |                         | u average | Model 38                      | 0.13       | 0.14             | < 0.01     | 4       | 29      | 27.1             | 0.31       | 0.17             | < 0.01                          | 4.5     | 13.7    | 17.9           | 0.00       | 0.00             | < 0.01                     | 0.01    | 0.19    | 5.48             |            |                  |         |         |         |
|                                       |                                   |                         | u strong  | Model 39                      | 14.72      | 46.7             | 2.73       | 74.3    | 50.6    | 99.94            | 15.47      | 47.1             | 2.9                             | 74.1    | 40.2    | 99.98          | 11.72      | 43.37            | 0.90                       | 70.09   | 32.74   | 98.71            |            |                  |         |         |         |
|                                       |                                   | Short bottleneck (100y) | u weak    | Model 40                      | 0.04       | 0.12             | 0.01       | 5.1     | 50      | 46.6             | 0.2        | 0.05             | < 0.01                          | 4.9     | 27.3    | 37.9           | 0.14       | 0.02             | < 0.01                     | 2.49    | 30.92   | 4.64             |            |                  |         |         |         |
|                                       |                                   |                         | u average | Model 41                      | 0.06       | 0.04             | < 0.01     | 3.8     | 45      | 26.5             | 0.21       | 0.02             | < 0.01                          | 4       | 22.8    | 17.9           | < 0.01     | < 0.01           | < 0.01                     | 0.28    | 16.27   | 0.21             |            |                  |         |         |         |
|                                       |                                   |                         | u strong  | Model 42                      | 0.13       | 0.57             | 0.04       | 7.1     | 24.6    | 71.5             | 0.65       | 0.61             | 0.02                            | 7.9     | 13.1    | 75.9           | 0.01       | < 0.01           | < 0.01                     | 0.88    | 0.18    | 49.14            |            |                  |         |         |         |
|                                       | Average bottleneck (N1/N2 = 5e-3) | Long bottleneck (500y)  | u weak    | Model 43                      | 0.11       | 0.09             | < 0.01     | 4.7     | 51.6    | 49.2             | 0.39       | 0.04             | < 0.01                          | 4.7     | 28.5    | 41.8           | 0.16       | 0.06             | < 0.01                     | 2.61    | 33.32   | 6.13             |            |                  |         |         |         |
|                                       |                                   |                         | u average | Model 44                      | 0.08       | 0.06             | 0.01       | 4.8     | 48.3    | 33.9             | 0.32       | < 0.01           | 0.01                            | 4.4     | 24.6    | 23.9           | 0.03       | 0.00             | < 0.01                     | 1.20    | 23.50   | 1.33             |            |                  |         |         |         |
|                                       |                                   |                         | u strong  | Model 45                      | 0.1        | 0.18             | < 0.01     | 4       | 31.5    | 47.3             | 0.37       | 0.18             | < 0.01                          | 4.8     | 15.2    | 52.5           | < 0.01     | < 0.01           | < 0.01                     | 0.00    | 1.04    | 14.08            |            |                  |         |         |         |
|                                       |                                   | Short bottleneck (100y) | u weak    | Model 46                      | 0.09       | 0.08             | 0.02       | 5.2     | 52      | 51.7             | 0.29       | 0.09             | 0.01                            | 4.9     | 29.5    | 45             | 0.13       | 0.06             | < 0.01                     | 3.28    | 34.06   | 7.09             |            |                  |         |         |         |
|                                       |                                   |                         | u average | Model 47                      | 0.12       | 0.06             | < 0.01     | 5.2     | 51.2    | 48               | 0.38       | 0.04             | < 0.01                          | 4.9     | 28.8    | 39.4           | 0.20       | 0.01             | < 0.01                     | 3.02    | 32.28   | 5.24             |            |                  |         |         |         |
|                                       |                                   |                         | u strong  | Model 48                      | 0.14       | 0.05             | < 0.01     | 4.3     | 47.1    | 40.1             | 0.35       | 0.05             | < 0.01                          | 4.5     | 24.2    | 37.8           | 0.02       | < 0.01           | < 0.01                     | 0.88    | 20.29   | 3.17             |            |                  |         |         |         |
|                                       | Weak bottleneck (N1/N2 = 5e-2)    | Long bottleneck (500y)  | u weak    | Model 49                      | 0.1        | 0.09             | < 0.01     | 5.1     | 52.1    | 51.9             | 0.36       | 0.05             | < 0.01                          | 5.1     | 29.7    | 45.5           | 0.22       | 0.02             | < 0.01                     | 2.84    | 34.11   | 7.57             |            |                  |         |         |         |
|                                       |                                   |                         | u average | Model 50                      | 0.11       | 0.09             | 0.01       | 5.2     | 51.3    | 50.9             | 0.27       | 0.05             | < 0.01                          | 5.1     | 28.3    |                |            |                  |                            |         |         |                  |            |                  |         |         |         |
